# Supplementary material for: Cell Size at S Phase Initiation: An Emergent Property of the G1/S Network
Source: PLOS journal article supplement (doi:10.1371/journal.pcbi.0030064), 2007-04-10
Supplement: S1 (10.1371/journal.pcbi.0030064.s001) [file journal.pcbi.0030064.s001]

**Table S1**

| <b>Response<sup>1</sup></b> |                    |                        |
|-----------------------------|--------------------|------------------------|
| <b>Rate constant</b>        | <b>Budding</b>     | <b>DNA replication</b> |
| $k_1$                       | Medium positive    | Medium positive        |
| $k_2$                       | –                  | High positive          |
| $k_3$                       | Low positive       | –                      |
| $k_4$                       | –                  | Medium positive        |
| $k_5$                       | High negative      | Very High negative     |
| $k_6$                       | Very High positive | Very High positive     |
| $k_7$                       | Medium positive    | High positive          |
| $k_8$                       | Medium negative    | High negative          |
| $k_9$                       | Medium negative    | Very High positive     |
| $k_{10}$                    | Low negative       | –                      |
| $k_{11}$                    | –                  | Medium negative        |
| $k_{12}$                    | Low negative       | –                      |
| $k_{13}$                    | –                  | Medium negative        |
| $k_{14}$                    | Low positive       | Medium positive        |
| $k_{15}$                    | Low negative       | Medium negative        |
| $k_{16}$                    | Low negative       | Medium negative        |
| $k_{17}$                    | Low positive       | Medium positive        |
| $k_{18}$                    | Low positive       | High negative          |
| $k_{19}$                    | Low positive       | Medium positive        |
| $k_{20}$                    | Low negative       | Medium negative        |
| $k_{21}$                    | Low negative       | Medium negative        |
| $k_{22}$                    | –                  | Medium positive        |
| $k_{25}$                    | Medium positive    | –                      |
| $k_{29}$                    | –                  | Medium negative        |
| $k_{35}$                    | –                  | High positive          |
| $k_{42}$                    | Medium negative    | High negative          |
| $k_{43}$                    | Medium positive    | High positive          |
| $k_{44}$                    | Medium positive    | High positive          |
| $k_{45}$                    | Medium negative    | Medium negative        |
| $k_{46}$                    | Low negative       | Medium positive        |
| $k_{48}$                    | –                  | Medium positive        |
| $k_{49}$                    | Low positive       | Medium positive        |
| $k_{53}$                    | Medium positive    | –                      |

| <b>Response<sup>1</sup></b>       |                    |                        |
|-----------------------------------|--------------------|------------------------|
| <b>Initial concentration</b>      | <b>Budding</b>     | <b>DNA replication</b> |
| Cdk1Cln3 <sub>nuc</sub>           | Very High positive | Very High positive     |
| Cdk1Cln3-Far1P <sub>nuc</sub>     | Very High positive | Very High positive     |
| Cdk1Cln3-Far1 <sub>nuc</sub>      | Very High positive | Very High positive     |
| Cln3 <sub>nuc</sub>               | Very High positive | Very High positive     |
| Cln3 <sub>cyt</sub>               | High positive      | Very High positive     |
| <i>mRNA</i> Cln1,2 <sub>nuc</sub> | High positive      | Very High positive     |
| <i>mRNA</i> Cln1,2 <sub>cyt</sub> | High positive      | Very High positive     |
| Cln1,2 <sub>cyt</sub>             | High positive      | Very High positive     |
| Cdk1Cln1,2 <sub>nuc</sub>         | High positive      | Very High positive     |
| Cdk1Cln1,2 <sub>cyt</sub>         | High positive      | Very High positive     |
| <i>mRNA</i> Clb5,6 <sub>cyt</sub> | –                  | High positive          |
| <i>mRNA</i> Clb5,6 <sub>nuc</sub> | –                  | High positive          |
| Clb5,6 <sub>cyt</sub>             | –                  | High positive          |
| Cdk1Clb5,6 <sub>cyt</sub>         | –                  | High positive          |
| Sic1 <sub>cyt</sub>               | –                  | High positive          |
| Cdk1Clb5,6-Sic1 <sub>cyt</sub>    | –                  | High positive          |
| Cdk1-Clb5,6 <sub>nuc</sub>        | –                  | Medium positive        |
| Cdk1Clb5,6-Sic1 <sub>nuc</sub>    | –                  | Medium positive        |
| Cdk1Clb5,6-Sic1P <sub>nuc</sub>   | –                  | Medium positive        |
| Cdk1 <sub>cyt</sub>               | –                  | Medium positive        |
| Cdk1 <sub>nuc</sub>               | Low positive       | Medium positive        |
| SBF/MBF <sub>nuc</sub>            | Low positive       | Medium positive        |
| SBF/MBF-Whi5 <sub>nuc</sub>       | High negative      | Very High positive     |
| Far1 <sub>cyt</sub>               | High negative      | Very High negative     |
| Far1 <sub>nuc</sub>               | High negative      | Very High negative     |
| Whi5 <sub>nuc</sub>               | High negative      | Medium negative        |
| Whi5 <sub>cyt</sub>               | –                  | Medium negative        |

<sup>1</sup> Symbol – means negligible effect.
